# Supplementary material for: Soil networks become more connected and take up more carbon as nature restoration progresses
Source: Springer Nature journal article supplement (doi:10.1038/ncomms14349), 2017-02-08
Supplement: 41467_2017_BFncomms14349_MOESM1550_ESM.pdf [file 41467_2017_BFncomms14349_MOESM1550_ESM.pdf]

## 1 **Supplementary Information**

### 2 **Supplementary Methods**

#### 3 Sequencing

4

5 Bacterial 16S rRNA gene fragments were amplified using the primer pair 530F (5'-  
6 ACTCCTACGGGAGGCAGCAG)<sup>1</sup> and 803R (5'-CTACCNGGGTATCTAAT-3'). The fungal ITS2 region was  
7 amplified using primers ITS4 (5'-TCC TCC GCT TAT TGA TAT GC-3') and ITS9 (5'- GAA CGC AGC RAA IIG  
8 YGA-3')<sup>2</sup>. Finally, bacterial and fungal amplicons were pooled at equimolar concentrations to provide  
9 a total of 2 ng DNA in each library.

10

11 Bacterial sequences were analysed using a Snakemake workflow<sup>3</sup> that follows the SOP for 454-  
12 sequencing data in mothur version 1.33.2<sup>4</sup>. The flowgrams were demultiplexed with a mismatch of 2  
13 to the barcode, 3 mismatches to the primer, and flowgrams were trimmed to a size of 575 flows.  
14 Flowgrams were corrected using the shhh.flows command, which is the mothur implementation of  
15 the original PyroNoise algorithm<sup>5</sup>. Afterwards the results of the different sff files were combined for  
16 further analysis. The merged sequences were aligned and classified with SINA<sup>6</sup> against the SILVA 119  
17 database<sup>7</sup>. Only reads that starts at position 9878 and stop at a position so that 90% of the sequence  
18 fall into this region were kept. To reduce sequence errors even more the pre.cluster command is  
19 used to merge sequences that are within 2 mismatches of each other. Chimeric sequences were  
20 identified and removed using the chimera.uchime command<sup>8</sup>. OTUs were formed at maximum  
21 distance of 0.03 using the dist.seqs command and average neighbour clustering. For each OTU a  
22 consensus taxonomy was determined using the classify.otu command. Representative sequences for  
23 each OTU were re-aligned to the Silva reference alignment and a neighbour joining tree was created  
24 using the clearcut program<sup>9</sup>. Taxonomic classification and OTU clustering data were combined into  
25 the BIOM format<sup>10</sup> for further downstream statistical analysis with the Phyloseq<sup>11</sup> package for R.

26

27 Fungal sequences were initially demultiplexed according to their multiplex identifier (MID) using the  
28 sffinfo command of Mothur v.1.22.2<sup>4</sup>. The raw flowgrams were filtered using the trim.flows  
29 command to a minimum flowgram length of 360 cycles before the first noisy signal (signal ranging  
30 from 0.5-0.7). All flowgrams were then truncated at 720 cycles. The internal transcribed spacer 2  
31 (ITS2) region was extracted using Fungal ITS extractor v 2<sup>12</sup> and sequences shorter than 100 bp were  
removed. See for more details Thomson *et al.*<sup>13</sup>.

32

33 For each microbial group, all sequences were pooled and sorted by decreasing length as  
34 recommended for Usearch clustering<sup>14</sup>. Operational taxonomic units (OTUs) were generated from  
35 these reads using the cluster\_smallmem command at a 97 % similarity threshold. Phylogenetic  
36 assignment was done for each OTU consensus sequence using the Basic Local Alignment Search Tool  
37 (BLAST) algorithm v 2.2.23<sup>15</sup> against the Ribosomal Data Project (RDP) database release 10.3<sup>16</sup> for  
38 bacterial and archaeal sequences. For fungi, the assignment was performed using the UNITE  
39 database release 5.0<sup>17</sup>. All phylogenies were determined using a minimum e-value cut-off of 1e-5.

40

41 For bacteria and fungi, matrices containing the sequence abundances of different OTUs in each soil  
42 sample were created. To obtain comparable samples with different number of sequences, data were  
43 rarefied to least amount of reads using the 'rrarefy' comment in the vegan package in R<sup>18</sup>. We  
44 confirmed that the selected amount of reads was approaching the saturation end of the rarefaction  
45 curve. This rarefaction procedure resulted in 2800 sequences for bacteria and 635 for fungi. The  
46 abundance of a certain OTU in a sample was used as an abundance measure for network analysis.  
47 The fungal reads were assigned into 15 ecological functional guilds (nr.31 till nr. 45) according to the  
48 Supplementary Table 5.

49 **Supplementary References**

- 50 1 Acosta-Martinez, V., Dowd, S., Sun, Y. & Allen, V. Tag-encoded pyrosequencing analysis of  
51 bacterial diversity in a single soil type as affected by management and land use. *Soil Biol*  
52 *Biochem* **40**, 2762-2770, doi:10.1016/j.soilbio.2008.07.022 (2008).
- 53 2 Ihrmark, K. *et al.* New primers to amplify the fungal ITS2 region - evaluation by 454-  
54 sequencing of artificial and natural communities. *FEMS Microbiol. Ecol.* **82**, 666-677,  
55 doi:10.1111/j.1574-6941.2012.01437.x (2012).
- 56 3 Koster, J. & Rahmann, S. Snakemake-a scalable bioinformatics workflow engine.  
57 *Bioinformatics* **28**, 2520-2522, doi:10.1093/bioinformatics/bts480 (2012).
- 58 4 Schloss, P. D. *et al.* Introducing mothur: Open-Source, Platform-Independent, Community-  
59 Supported Software for Describing and Comparing Microbial Communities. *Appl Environ*  
60 *Microbiol* **75**, 7537-7541, doi:10.1128/aem.01541-09 (2009).
- 61 5 Quince, C., Lanzen, A., Davenport, R. J. & Turnbaugh, P. J. Removing Noise From  
62 Pyrosequenced Amplicons. *BMC Bioinformatics* **12**, doi:10.1186/1471-2105-12-38 (2011).
- 63 6 Pruesse, E., Peplies, J. & Glöckner, F. O. SINA: Accurate high-throughput multiple sequence  
64 alignment of ribosomal RNA genes. *Bioinformatics* **28**, 1823-1829,  
65 doi:10.1093/bioinformatics/bts252 (2012).
- 66 7 Quast, C. *et al.* The SILVA ribosomal RNA gene database project: improved data processing  
67 and web-based tools. *Nucleic Acids Res* **41**, D590-D596, doi:10.1093/nar/gks1219 (2013).
- 68 8 Edgar, R. C., Haas, B. J., Clemente, J. C., Quince, C. & Knight, R. UCHIME improves sensitivity  
69 and speed of chimera detection. *Bioinformatics* **27**, 2194-2200,  
70 doi:10.1093/bioinformatics/btr381 (2011).
- 71 9 Sheneman, L., Evans, J. & Foster, J. A. Clearcut: a fast implementation of relaxed neighbor  
72 joining. *Bioinformatics* **22**, 2823-2824, doi:10.1093/bioinformatics/btl478 (2006).
- 73 10 McDonald, D. *et al.* An improved Greengenes taxonomy with explicit ranks for ecological and  
74 evolutionary analyses of bacteria and archaea. *Isme Journal* **6**, 610-618,  
75 doi:10.1038/ismej.2011.139 (2012).
- 76 11 McMurdie, P. J. & Holmes, S. phyloseq: An R Package for Reproducible Interactive Analysis  
77 and Graphics of Microbiome Census Data. *Plos One* **8**, doi:10.1371/journal.pone.0061217  
78 (2013).
- 79 12 Nilsson, R. H. *et al.* An open source software package for automated extraction of ITS1 and  
80 ITS2 from fungal ITS sequences for use in high-throughput community assays and molecular  
81 ecology. *Fungal Ecology* **3**, 284-287, doi:10.1016/j.funeco.2010.05.002 (2010).
- 82 13 Thomson, B. C. *et al.* Soil conditions and land use intensification effects on soil microbial  
83 communities across a range of European field sites. *Soil Biology and Biochemistry* **88**, 403-  
84 413, doi:http://dx.doi.org/10.1016/j.soilbio.2015.06.012 (2015).
- 85 14 Edgar, R. C. Search and clustering orders of magnitude faster than BLAST. *Bioinformatics* **26**,  
86 2460-2461, doi:10.1093/bioinformatics/btq461 (2010).
- 87 15 Altschul, S. F., Gish, W., Miller, W., Myers, E. W. & Lipman, D. J. Basic Local Alignment Search  
88 Tool. *J Mol Biol* **215**, 403-410, doi:10.1006/jmbi.1990.9999 (1990).
- 89 16 Cole, J. R. *et al.* The Ribosomal Database Project: improved alignments and new tools for  
90 rRNA analysis. *Nucleic Acids Res* **37**, D141-D145, doi:10.1093/nar/gkn879 (2009).
- 91 17 Koljalg, U. *et al.* Towards a unified paradigm for sequence-based identification of fungi.  
92 *Molec. Ecol.* **22**, 5271-5277, doi:10.1111/mec.12481 (2013).
- 93 18 R: A language and environment for statistical computing. R foundation for statistical  
94 computing, Vienna, <http://www.R-project.org/>. (2013).

97 Supplementary Figures

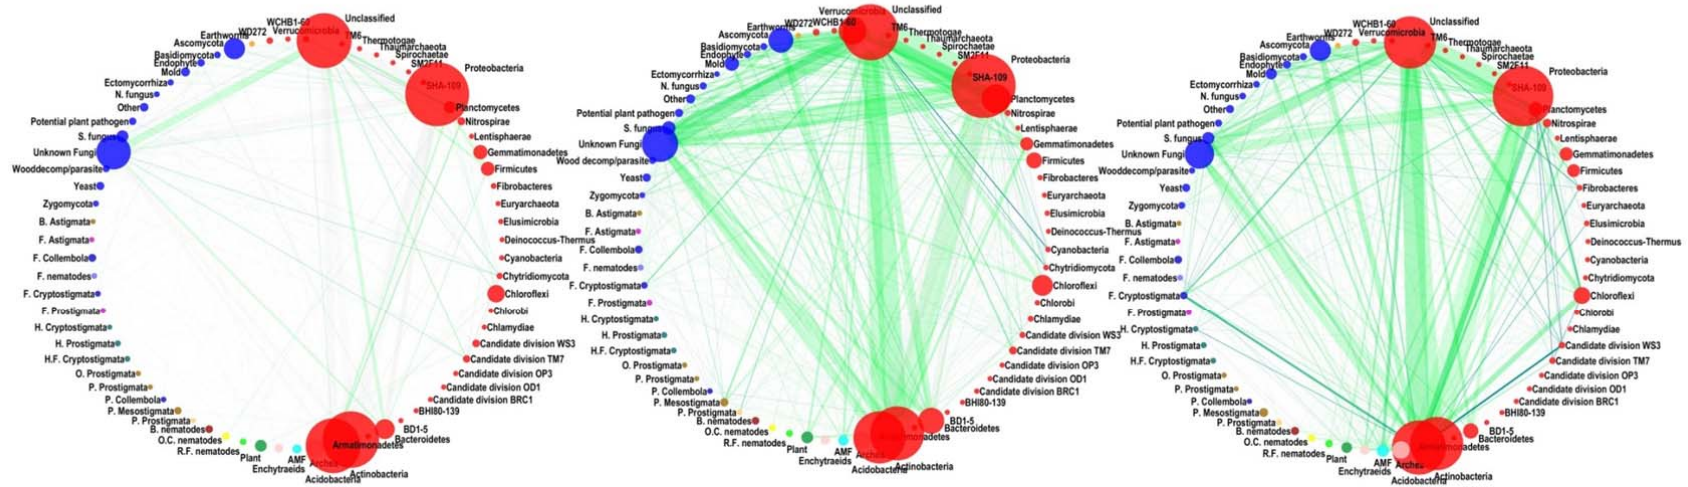

98

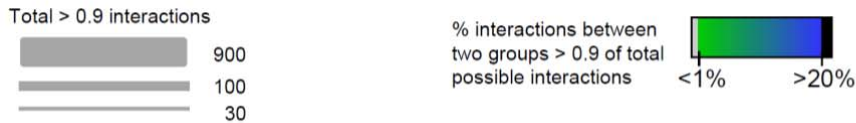

99

100 Supplementary Figure 1: Co-occurrence network visualisation sub-groups. Network visualisation of the interaction strengths between the species sub-groups in recently, mid-  
 101 term and long-term abandoned agricultural fields. Spearman correlations between the co-occurrences of all individual species of different fields were calculated. The proportion of  
 102 correlations > 0.9 was divided by the total number of possible interactions in order to obtain the interaction strength between two groups of species. Line width is proportional to the  
 103 absolute number of correlations > 0.9. Line colour and transparency is proportional to the interactions strength as indicated in the legend. The size of the circles is proportional to the number  
 104 of species/taxa in that group. Red circles are bacterial groups, blue circles are fungal groups. Abbreviations: H.=Herbivorous R.F.=Root-feeding S.=Saprotrophic F.=Fungivorous  
 105 B.=Bacterivorous H.F.=Herbofungivorous N.=Nematophagous O.=Omnivorous O.C.=Omni-carnivorous P.=Predaceous.

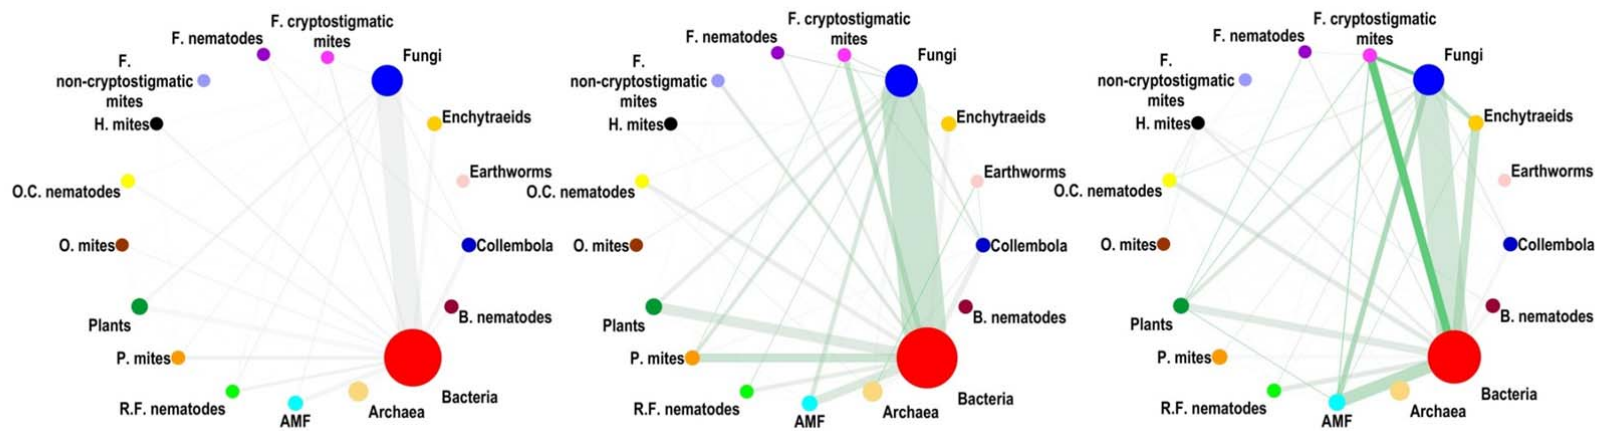

106

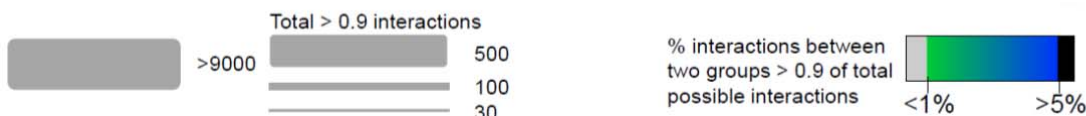

107

108

109

110

111

112

113

114

115

Supplementary Figure 2: Co-occurrence network visualisation main groups. Network visualisation of the interaction strengths between the main species groups in recently, mid-term and long-term abandoned agricultural fields. Spearman correlations between the co-occurrence of all individual species of different fields were calculated. The proportion of correlations > 0.9 was divided by the total number of possible interactions to obtain the interaction strength between two groups of species. Line width is proportional to the absolute number of correlations > 0.9. Line colour and transparency is proportional to the interactions strength as indicated in the legend. The size of the circles is proportional to the number of species/taxa in that group. Red circles are bacterial groups, blue circles are fungal groups. Abbreviations: H.=Herbivorous R.F.=Root-feeding S.=Saprotrophic F.=Fungivorous B.=Bacterivorous H.F.=Herbofungivorous N.=Nematophagous O.=Omnivorous O.C.=Omni-carnivorous P.=Predaceous.

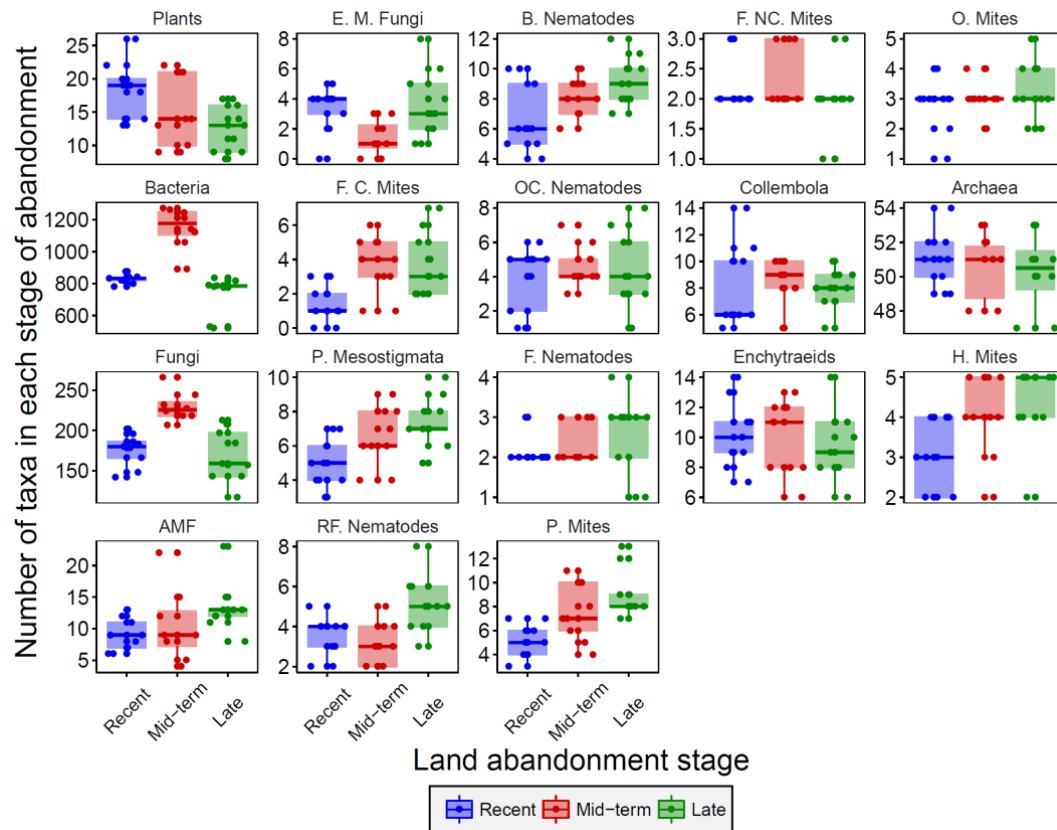

116

117 Supplementary Figure 3: Graphical representation of the Supplementary Table 5. Showing number of taxa in each stage of abandonment per sampling site.  
 118 Abbreviations of field sites see site description Supplementary Table 1. Additional to Supplementary Table 5 the ectomycorrhizal fungi and predaceous mesostigmata are displayed since they  
 119 show significant patterns along the successional gradient. Total amount of species within the different species groups were plotted among field sites (each bar), categories of sites (recent-  
 120 (blue), mid- (red) and long-term (green) abandoned) and in years since abandonment (left to right). Line represents the median. The boxes represent the upper- and under-quartile of the  
 121 data range. The whiskers represent 1.5 times the distance between the first and third quartile. Data beyond the end of the whiskers are outliers and plotted as points (as specified by Tukey).  
 122 Abbreviations: E. M. fungi=Ectomycorrhizal fungi, F. C. mites=Fungivorous cryptostigmatic mites, P. mesostigmata=Predaceous mesostigmatic mites, R.F. nematodes=Root-feeding  
 123 nematodes, B. nematodes=Bacterivorous nematodes, OC. nematodes=Omni-carnivorous nematodes, F. nematodes=Fungivorous nematodes, P. mites= Predaceous mites, F.NC.  
 124 Mites=Fungivorous non-cryptostigmatic mites, O. mites=Omnivorous mites H. mites=Herbivorous mite.

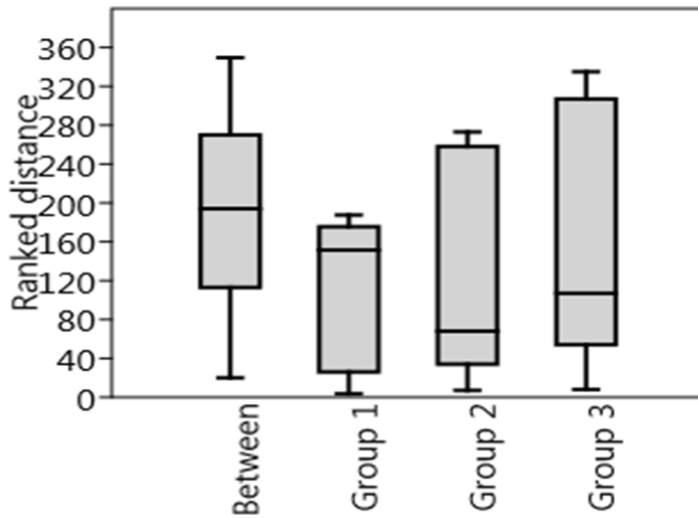

125  
126

127 **Supplementary Figure 4: Results of Analysis of similarities.** ANOSIM (Euclidian, R- and p-values given) on  
 128 soil properties at recent, mid- and long-term abandoned fields. The variation of the similarities between groups (recent-,  
 129 mid-term-, long-term abandoned since agricultural practice, first boxplot left) is larger than the variation within groups 1, 2  
 130 and 3 representing recent-, mid-term and long-term abandonment (R=0.2333; p=0.0041). Within groups the variation of  
 131 the recently abandoned fields is significantly higher than of the mid-term abandoned fields (p=0.0033), however, not  
 132 significantly higher than of the long-term abandoned fields (p=0.0544).

133

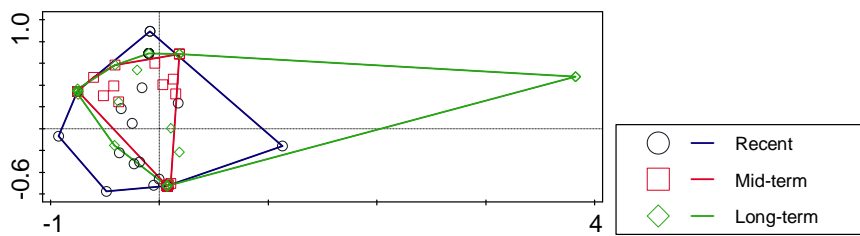

134

135 **Supplementary Figure 5: NMDS of the rank abundance of plants in cores.** Non-metric Multidimensional  
 136 Scaling (NMDS) of the rank abundance of the three most dominated plant species (*Agrostis capillaris*, *Holcus lanatus*,  
 137 *Plantago lanceolata*) in each of the experimental cores, which shows strong overlap in the plant community between the  
 138 cores.

139

140

141

142

143

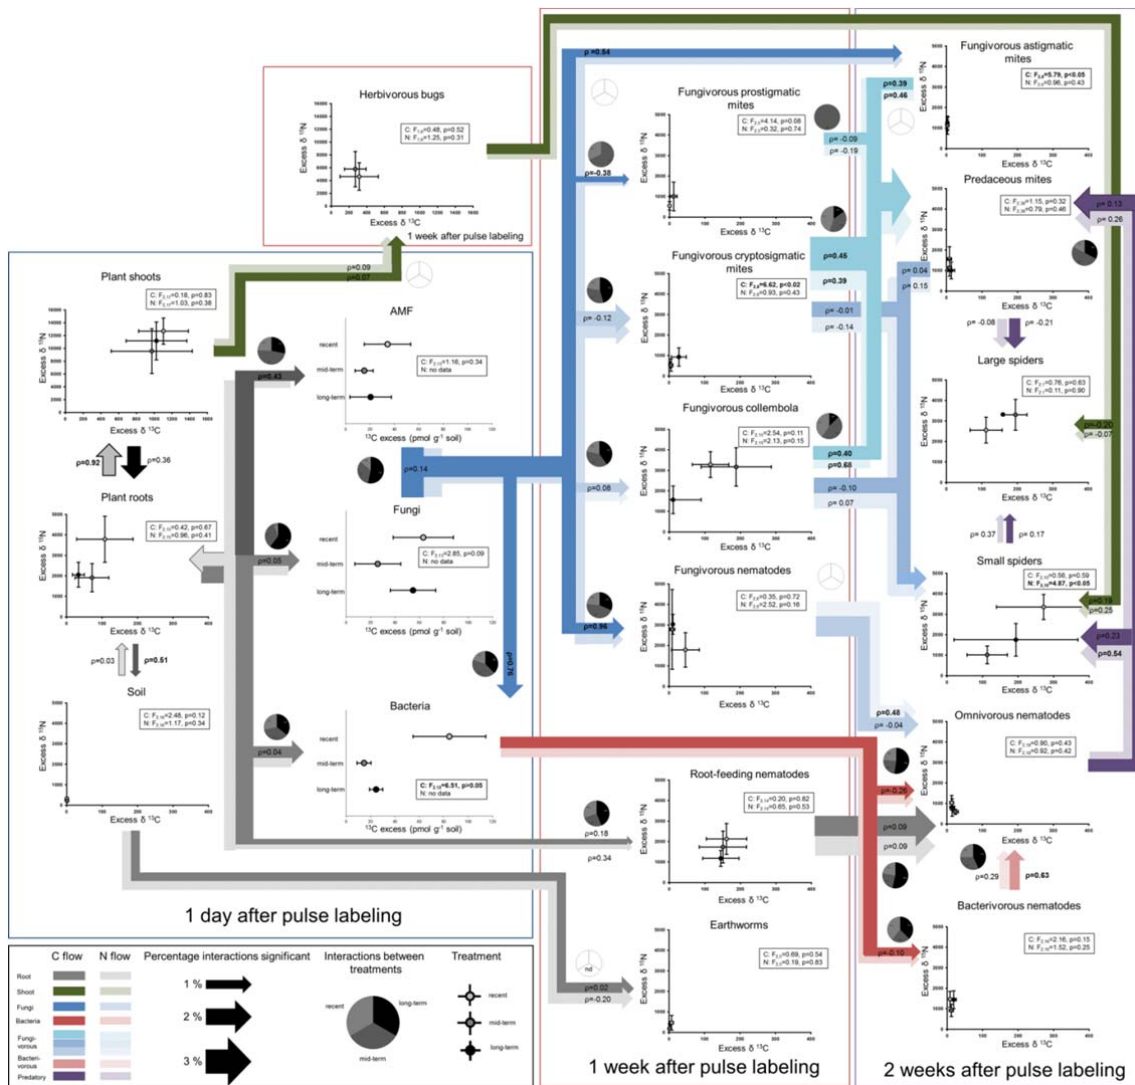

146 Supplementary Figure 6: Carbon and nitrogen flow in the soil food-web during 2 weeks. The root  
 147 root derived carbon is marked with grey, shoot carbon with green, bacterial-based channel with red,  
 148 fungal-based channel with blue and the higher trophic level interactions with purple and pink. The plots with standard deviation represent the  
 149 amount of  $^{13}\text{C}$  excess in pmol per gram soil (bacteria, fungi, AMF), or  $\delta^{13}\text{C}$  and  $\delta^{15}\text{N}$  excess (all other groups) compared to  
 150 natural values measured from non-labelled controls in recently (light grey), mid-term (dark grey) and long-term (black)  
 151 abandoned agricultural fields. The statistical analyses of the treatment effects with field site as a factor nested in  
 152 successional stage are presented in boxes next to the figure. The darker coloured arrows depict the carbon flow in the food  
 153 web while the lighter coloured (dashed) arrows depict the nitrogen flow. The width of the arrows between groups reflects the  
 154 percentage of correlation  $>0.9$  between groups in all the fields as in Fig. 1. The pie charts above the arrows are also  
 155 calculated from Fig. 1, and represent the proportion of significant interactions in recently (light grey), mid-term (dark grey)  
 156 and long-term (black) abandoned fields. The (rho)p values at the arrows represent the Spearman-rank correlation values  
 157 between the groups that are connected by the arrow, which is calculated from the labelling data. Significant correlations  
 158 are bold and marked with darker arrow colour. By correlation analysis of pulse labelling data we wanted to analyse the  
 159 potential of feeding relationships that emerged on the basis of correlations in the network analysis.

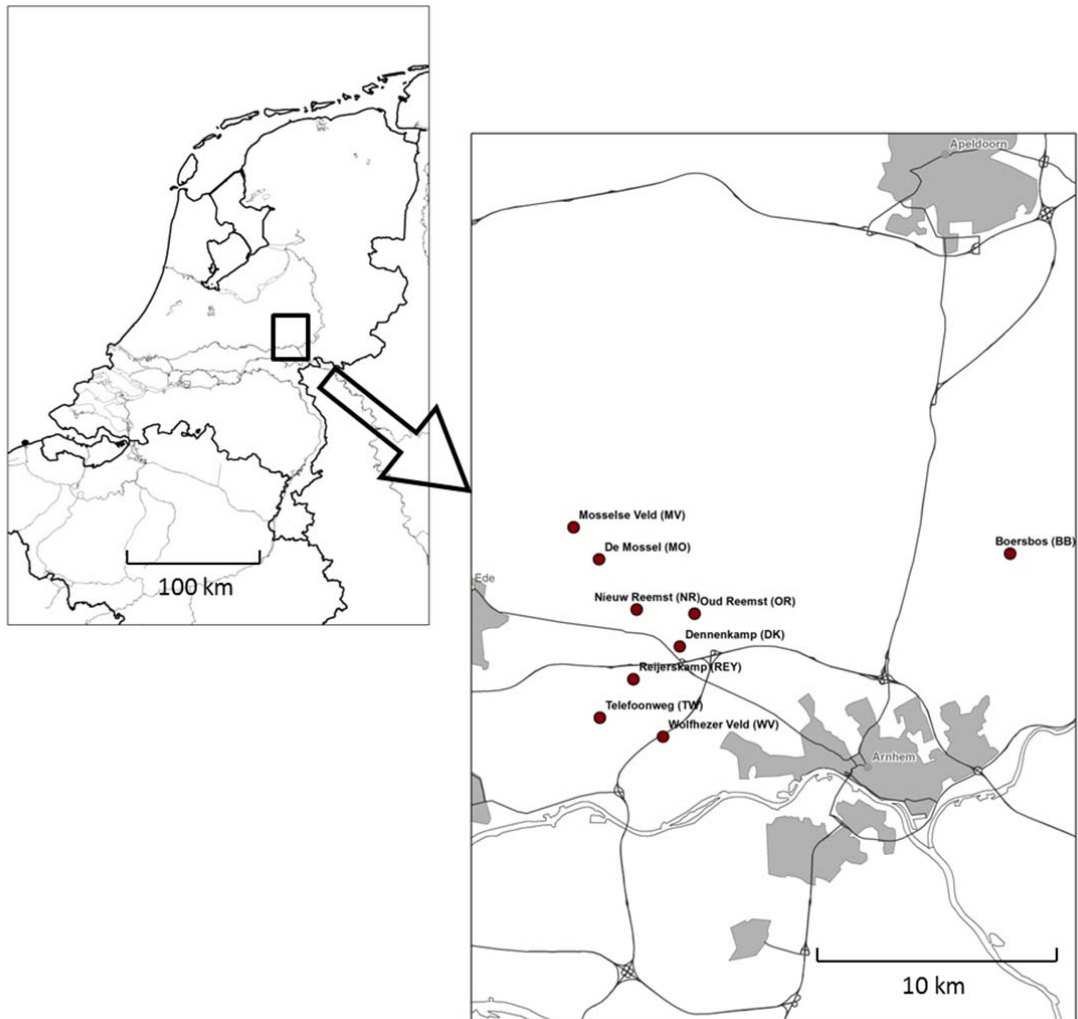

164 Supplementary Figure 7: Map of sampling sites in The Netherlands



174

175

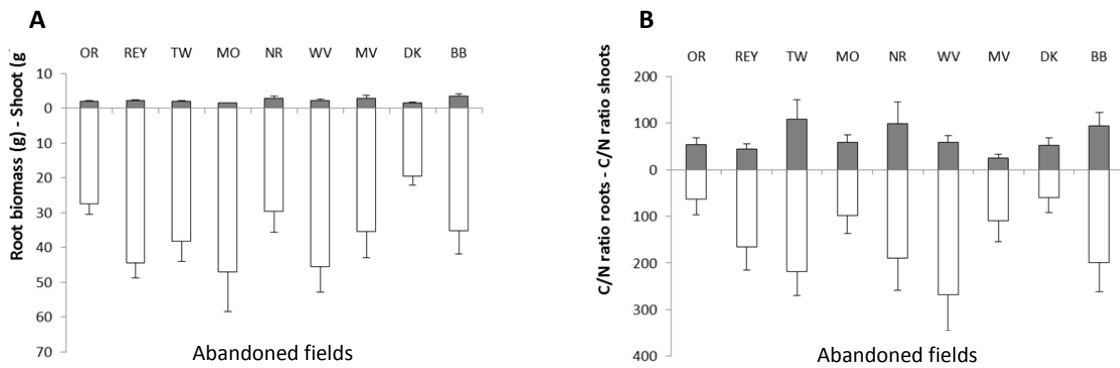

176

177 Supplementary Figure 8: Shoot + root biomass & C/N ratio of the plants. A. Shoot + root biomass in grams  
 178 of the plants from the cores at the time of harvest. Abbreviations of field sites see site description Supplementary Table 1.  
 179 B. C/N ratio of the plant shoots and roots from the cores at the time of harvest. Abbreviations of field sites see site

180 description Supplementary Table 1.  
 181 Error bars represent standard errors  
 182 of the mean (s.e.m.).

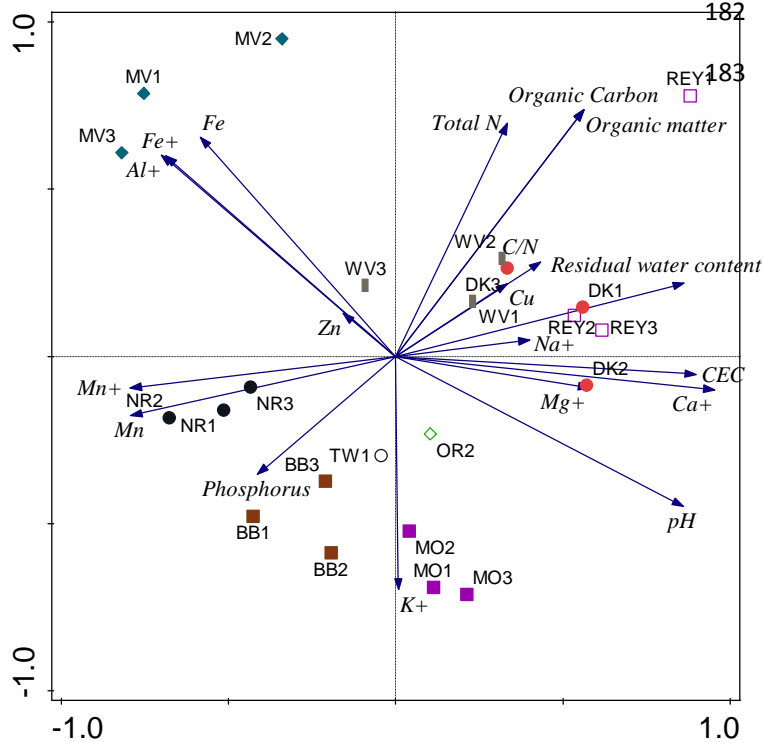

184

185 Supplementary Figure 9: PCA of site variation explained by the physiochemical data. Principal  
 186 Component Analysis of site variation explained by the physiochemical data collected in October 2011. Abbreviations of  
 187 field sites have been provided in the site description of Supplementary Table 4. Phosphorus ( $P_2O_5$ ) is measured as P-Olsen  
 188 in g/kg, Cation Exchange Capacity (Cobaltihexamine) and all ions indicated with a '+' are measured as cmol/kg, Residual  
 189 water content is the g/kg water remaining after drying at 105°C, metals have mg/kg as a unit, Organic Matter, Organic  
 190 Carbon and Total N are measured as g/kg.

191

192

193

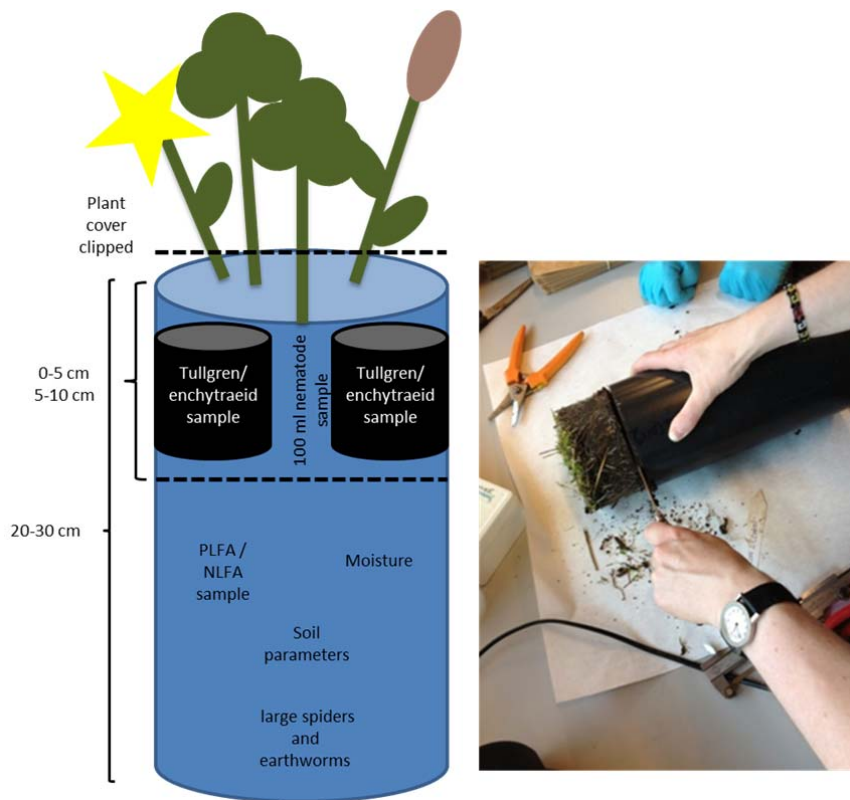

194

195 Supplementary Figure 10: Core harvesting scheme.

196

197

198

199

200

201

202

203

204

205

206

207

208

209 **Supplementary Tables**

210 Supplementary Table 1: Nested ANOVA results for Supplementary Fig. 4. Nested ANOVA results for each of  
 211 the graphs from Supplementary Fig. 4. We analysed the number of species per aggregated group in three ways: the effect  
 212 of site, succession, and time since abandonment. The sites OR, REY and TW (S-Table 1) were categorized as recently  
 213 abandoned fields, MO, NR and WV as mid-term abandoned fields and MV, DK and BB as long-term abandoned fields. These  
 214 categories mark the factor 'succession'. We also analysed the effect as a regression taking 'time since abandonment' as a  
 215 continuous variable (S-Table 1). For the other factors we used a nested ANOVA approach: when testing 'site' as a factor,  
 216 subplots were nested in 'site' and when testing 'succession' as a factor, sites were nested in 'succession'.

217

|                                       | Site            |                   | Succession      |                   | Time since abandonment |                   |
|---------------------------------------|-----------------|-------------------|-----------------|-------------------|------------------------|-------------------|
|                                       | <i>F-values</i> | <i>P-values</i>   | <i>F-values</i> | <i>P-values</i>   | <i>F-values</i>        | <i>P-values</i>   |
| Bacteria                              | 12.4            | <b>&lt;0.0001</b> | 44.4            | <b>&lt;0.0001</b> | 1.28                   | 0.274             |
| Archaea                               | 1.11            | 0.412             | 0.348           | 0.712             | 1.06                   | 0.316             |
| Collembola                            | 1.03            | 0.449             | 0.225           | 0.801             | <0.001                 | 0.984             |
| Earthworms                            | 1.96            | 0.112             | 1.86            | 0.185             | <0.001                 | 0.978             |
| Enchytraeids                          | 0.407           | 0.902             | 0.215           | 0.808             | 0.399                  | 0.536             |
| AMF                                   | 1.85            | 0.136             | 2.71            | 0.095             | 5.93                   | <b>0.026</b>      |
| Fungi                                 | 1.3             | <b>&lt;0.0001</b> | 33.8            | <b>&lt;0.0001</b> | 0.156                  | 0.698             |
| Predaceous mites                      | 2.2             | 0.078             | 7.51            | <b>0.0043</b>     | 14.4                   | <b>0.001</b>      |
| Fungivorous cryptostigmatic mites     | 8.82            | <b>&lt;0.0001</b> | 14.4            | <b>&lt;0.001</b>  | 36.3                   | <b>&lt;0.0001</b> |
| Omnivorous mites                      | 0.763           | 0.639             | 0.684           | 0.517             | 1.58                   | 0.225             |
| Herbivorous mites                     | 6.38            | <b>&lt;0.001</b>  | 9.75            | <b>0.0014</b>     | 27.3                   | <b>&lt;0.0001</b> |
| Fungivorous non-cryptostigmatic mites | 1.4             | 0.262             | 1.4             | 0.272             | 0.072                  | 0.792             |
| Root-feeding nematodes                | 4.85            | <b>0.003</b>      | 10.7            | <b>&lt;0.001</b>  | 10.5                   | <b>0.005</b>      |
| Bacterivorous nematodes               | 2.52            | <b>0.049</b>      | 4.84            | <b>0.021</b>      | 9.07                   | <b>0.007</b>      |
| Fungivorous nematodes                 | 4.67            | <b>0.003</b>      | 1.17            | 0.334             | 1.98                   | 0.176             |
| Omni-carnivorous nematodes            | 1.02            | 0.458             | 0.557           | 0.583             | 0.173                  | 0.683             |
| Plants                                | 9.48            | <b>&lt;0.0001</b> | 11.3            | <b>&lt;0.001</b>  | 31.4                   | <b>&lt;0.0001</b> |
| Ectomycorrhiza                        | 2.6             | <b>0.047</b>      | 4.95            | <b>0.02</b>       | 0.144                  | 0.709             |
| Predaceous mesostigmata               | 2.06            | 0.096             | 5.48            | <b>0.014</b>      | 9.54                   | <b>0.006</b>      |

218

219

220 Supplementary Table 2: Amount of variation explained by all measured soil properties via constrained analysis. Linear (RDA) or unimodal (CCA), dependent on the  
 221 length of the gradient. Then via a forward selection procedure the most explaining soil properties were selected and used to re-analyse the constrained analysis. The variation explained by  
 222 each of the significant contributing soil properties is displayed below. Phosphorus (P<sub>2</sub>O<sub>5</sub>) is measured as P-Olsen in g/kg, Cation Exchange Capacity (Cobaltihexamine) and all ions indicated  
 223 with a '+' are measured as cmol+/kg, Residual water content is the g/kg water remaining after drying at 105°C, metals have mg/kg as a unit, Organic Matter, Organic Carbon and Total N are  
 224 measured as g/kg.

| Group             | % var. expl. by all soil properties | Most expl. soil property 1 |            |       | Most expl. soil property 2 |            |       | Most expl. soil property 3 |            |       | Most expl. soil property 4 |            |       | Most expl. soil property 5 |            |       | Most expl. soil property 6 |            |       |
|-------------------|-------------------------------------|----------------------------|------------|-------|----------------------------|------------|-------|----------------------------|------------|-------|----------------------------|------------|-------|----------------------------|------------|-------|----------------------------|------------|-------|
|                   |                                     | Env. Var.                  | Var. expl. | P     | Env. Var.                  | Var. expl. | P     | Env. Var.                  | Var. expl. | P     | Env. Var.                  | Var. expl. | P     | Env. Var.                  | Var. expl. | P     | Env. Var.                  | Var. expl. | P     |
| Bacteria          | 38.9% (CCA)                         | Fe <sup>+</sup>            | 10.5%      | 0.002 | Water                      | 6.7%       | 0.002 | Fe                         | 6%         | 0.002 | CEC                        | 5.8%       | 0.01  |                            |            |       |                            |            |       |
| Archaea           | 46.1% (RDA)                         | Cu                         | 12.4%      | 0.042 |                            |            |       |                            |            |       |                            |            |       |                            |            |       |                            |            |       |
| Fungi (incl. AMF) | 38.4% (CCA)                         | Fe <sup>+</sup>            | 10.9%      | 0.002 | C/N                        | 6.2%       | 0.002 | Fe                         | 5.7%       | 0.006 | P                          | 5.3        | 0.036 | pH                         | 5.4%       | 0.022 |                            |            |       |
| Protists          | 28.4% (CCA)                         | Fe <sup>+</sup>            | 17.1%      | 0.002 | Fe                         | 7.9%       | 0.004 | Cu                         | 7.3%       | 0.004 | P                          | 6.1%       | 0.004 |                            |            |       |                            |            |       |
| Nematodes         | 34.6% (RDA)                         | Na <sup>+</sup>            | 12.6%      | 0.004 | Org. C                     | 7%         | 0.062 | Mg <sup>+</sup>            | 7.1%       | 0.013 | Ca <sup>+</sup>            | 9.5%       | 0.036 |                            |            |       |                            |            |       |
| Enchytraeids      | 54.4% (CCA)                         | Fe <sup>+</sup>            | 17%        | 0.002 | Fe                         | 7.9%       | 0.004 | Cu                         | 7.3%       | 0.004 | P                          | 6.1%       | 0.01  | Org C                      | 6.4%       | 0.004 | Ca                         | 5.0%       | 0.038 |
| Mites             | 29.4% (RDA)                         | P                          | 13%        | 0.016 | Al <sup>+</sup>            | 12.3%      | 0.018 |                            |            |       |                            |            |       |                            |            |       |                            |            |       |
| Collembola        | 48.5% (RDA)                         | Fe <sup>+</sup>            | 16.6%      | 0.024 | K <sup>+</sup>             | 11.5%      | 0.05  | C/N                        | 14.4%      | 0.028 |                            |            |       |                            |            |       |                            |            |       |
| Plants            | 68.4% (CCA)                         | pH                         | 13.2%      | 0.002 | Org. C                     | 11.1%      | 0.002 | P                          | 7.9%       | 0.008 | Al <sup>+</sup>            | 6.8%       | 0.002 | C/N                        | 6.9%       | 0.006 | Tot N                      | 6.9%       | 0.002 |

225

226  
227  
228  
229  
230  
231

Supplementary Table 3: Average label in each of the measured groups at all harvest points: 1 day, 1 week and 2 weeks after pulse labelling in atom% C. The table shows the significance levels of the three successional stages in an ANOVA with a nested design. The sites OR, REY and TW (S-Table 1) were categorized as recently abandoned fields, MO, NR and WV as mid-term abandoned fields and MV, DK and BB as long-term abandoned fields. These categories mark the factor 'succession'. Where sites are nested in succession time.

Generalized Linear Model with Nested design. Field nested in succession time

|                      |                                   |                              | Average | Stdev | Stats                             |                                   |
|----------------------|-----------------------------------|------------------------------|---------|-------|-----------------------------------|-----------------------------------|
| <b>1 day</b>         | Plant shoots                      | Recent                       | 1.62    | 0.334 | F(2,17) = 0.18 ,<br>p=0.83        |                                   |
|                      |                                   | Mid                          | 1039,00 | 0.482 |                                   |                                   |
|                      |                                   | Long                         | 1098,00 | 0.363 |                                   |                                   |
|                      | Plant roots                       | Recent                       | 0.119   | 0.086 | F(2,15) = 0.42 ,<br>p=0.67        |                                   |
|                      |                                   | Mid                          | 0.080   | 0.052 |                                   |                                   |
|                      |                                   | Long                         | 0.038   | 0.017 |                                   |                                   |
|                      | Soil                              | Recent                       | 0.000   | 0.000 | F(2,16) = 2.49 ,<br>p=0.11        |                                   |
|                      |                                   | Mid                          | 0.001   | 0.001 |                                   |                                   |
|                      |                                   | Long                         | 0.000   | 0.000 |                                   |                                   |
| <b>1 week</b>        | Earthworms                        | Recent                       | 0.008   | 0.005 | F(2,5) = 0.70 ,<br>p=0.54         |                                   |
|                      |                                   | Mid                          | 0.001   | 0.000 |                                   |                                   |
|                      |                                   | Long                         | 0.003   | nd    |                                   |                                   |
|                      | Root-feeding nematodes            | Recent                       | 0.175   | 0.062 | F(2,14) = 0.20 ,<br>p=0.82        |                                   |
|                      |                                   | Mid                          | 0.164   | 0.072 |                                   |                                   |
|                      |                                   | Long                         | 0.157   | 0.055 |                                   |                                   |
|                      | Fungal-feeding nematodes          | Recent                       | 0.045   | 0.040 | F(2,6) = 0.35 ,<br>p=0.72         |                                   |
|                      |                                   | Mid                          | 0.003   | 0.004 |                                   |                                   |
|                      |                                   | Long                         | 0.009   | 0.003 |                                   |                                   |
|                      | Fungivorous collembola            | Recent                       | 0.125   | 0.056 | F(2,15) = 2.54 ,<br>p=0.11        |                                   |
|                      |                                   | Mid                          | 0.204   | 0.107 |                                   |                                   |
|                      |                                   | Long                         | 0.011   | 0.010 |                                   |                                   |
|                      | Fungivorous cryptostigmatic mites | Recent                       | 0.007   | 0.004 | <b>F(2,8) = 6.62 ,<br/>p=0.02</b> |                                   |
|                      |                                   | Mid                          | 0.056   | 0.067 |                                   |                                   |
|                      |                                   | Long                         | 0.025   | 0.022 |                                   |                                   |
|                      | Fungivorous prostigmatic mites    | Recent                       | 0.000   | 0.000 | <b>F(4,5) = 9.42 ,<br/>p=0.02</b> |                                   |
|                      |                                   | Mid                          | 0.012   | 0.010 |                                   |                                   |
|                      |                                   | Long                         | 0.001   | 0.001 |                                   |                                   |
|                      | Herbivorous bugs                  | Recent                       | 0.340   | 0.233 | F(1,6) = 0.48 ,<br>p=0.52         |                                   |
|                      |                                   | Mid                          | 0.293   | 0.131 |                                   |                                   |
|                      |                                   | Long                         | nd      | nd    |                                   |                                   |
|                      | <b>2 weeks</b>                    | Bacterial feeding nematodes  | Recent  | 0.009 | 0.003                             | F(2,16) = 2.16 ,<br>p=0.15        |
|                      |                                   |                              | Mid     | 0.013 | 0.007                             |                                   |
|                      |                                   |                              | Long    | 0.021 | 0.008                             |                                   |
|                      |                                   | Fungivorous astigmatic mites | Recent  | 0.004 | 0.003                             | <b>F(2,6) = 5.79 ,<br/>p=0.04</b> |
|                      |                                   |                              | Mid     | 0.013 | 0.012                             |                                   |
|                      |                                   |                              | Long    | 0.005 | 0.002                             |                                   |
| Predaceous mites     |                                   | Recent                       | 0.008   | 0.007 | F(2,38) = 0.79 ,<br>p=0.46        |                                   |
|                      |                                   | Mid                          | 0.01    | 0.006 |                                   |                                   |
|                      |                                   | Long                         | 0.059   | 0.085 |                                   |                                   |
| Predaceous spiders   |                                   | Recent                       | 0.126   | 0.012 | F(2,10) = 0.56 ,<br>p=0.59        |                                   |
|                      |                                   | Mid                          | 0.216   | 0.035 |                                   |                                   |
|                      |                                   | Long                         | 0.177   | nd    |                                   |                                   |
| Omnivorous nematodes |                                   | Recent                       | 0.014   | 0.006 | F(2,18) = 0.90 ,<br>p=0.43        |                                   |
|                      |                                   | Mid                          | 0.026   | 0.009 |                                   |                                   |
|                      |                                   | Long                         | 0.016   | 0.008 |                                   |                                   |

232

233 Supplementary Table 4: Averages and standard deviations of delta <sup>13</sup>C values. Averages and standard  
 234 deviations of delta <sup>13</sup>C values of unlabelled controls and labelled material of 1 day, 1 week and two weeks after pulse  
 235 labelling. Numbers in bold indicate the highest numbers, the moment at which the pulse has in incorporated most <sup>13</sup>C in  
 236 the tissue of the measured group of soil biota. That point was chosen to represent the label incorporated in that specific  
 237 group of soil organisms.

238

|                                   | Non-labeled |       | 1 day          |               | 1 week        |               | 2 weeks       |                 |
|-----------------------------------|-------------|-------|----------------|---------------|---------------|---------------|---------------|-----------------|
|                                   | Average     | Stdev | Average        | Stdev         | Average       | Stdev         | Average       | Stdev           |
| Plant shoots                      | -29.54      | 1.28  | <b>1002.33</b> | <b>713.03</b> | 959.07        | 363.87        | 563.79        | 358.55          |
| Plant roots                       | -29.78      | 0.57  | <b>42.65</b>   | <b>108.56</b> | 23.42         | 72.20         | 53.36         | 99.01           |
| Soil                              | -27.92      | 0.96  | <b>-27.42</b>  | <b>1.18</b>   | -27.54        | 1.45          | -27.08        | 1.38            |
| Earthworms                        | -25.82      | 1.12  | -22.94         | 6.60          | <b>-22.72</b> | <b>5.31</b>   | -22.07        | 3.38            |
| Root-feeding nematodes            | -27.43      | 5.78  | 80.54          | 96.50         | <b>125.39</b> | <b>111.64</b> | 125.95        | 172.38          |
| Fungal-feeding nematodes          | -27.94      | 2.35  | -25.47         | 3.10          | <b>-7.33</b>  | <b>49.83</b>  | -9.42         | 25.23           |
| Fungivorous collembola            | -23.42      | 1.84  | 57.19          | 62.80         | <b>93.05</b>  | <b>149.33</b> | 81.15         | 106.62          |
| Fungivorous cryptostigmatic mites | -24.63      | 0.27  | -17.22         | 15.17         | <b>-11.72</b> | <b>27.60</b>  | -20.58        | 6.00            |
| Fungivorous prostigmatic mites    | -23.99      | 0.32  | -16.20         | 13.21         | <b>-18.68</b> | <b>13.20</b>  | -19.34        | 8.14            |
| Herbivorous bugs                  | -21.65      | -     | <b>541.14</b>  | <b>963.12</b> | 294.63        | 358.55        | 135.46        | 130.44          |
| Bacterial feeding nematodes       | -26.66      | 2.59  | -16.60         | 27.08         | -19.68        | 7.18          | <b>-15.11</b> | <b>11827.00</b> |
| Fungivorous astigmatic mites      | -22.45      | 3.76  | -22.94         | 4.47          | -23.03        | 3.73          | <b>-17.38</b> | <b>13.47</b>    |
| Predaceous mites                  | -23.84      | 2.52  | -16.65         | 9.22          | -14.31        | 18.28         | <b>-1.66</b>  | <b>86.77</b>    |
| Predaceous spiders                | -24.21      | 1.82  | -24.83         | 1.72          | 167.54        | 262.84        | <b>125.70</b> | <b>76.11</b>    |
| Omnivorous nematodes              | -24.06      | 9.11  | -20.71         | 9.32          | -1.656        | 36.39         | <b>-6.84</b>  | <b>14.56</b>    |
| Enchytraeds                       | -27.67      | -     | -17.21         | 10.78         | -39.79        | -             | -28.94        | 5.12            |

239

240 Supplementary Table 5: Description of field sites coordinates and time since abandonment.

| Field name          | Geocoordinates       | Abandoned since |
|---------------------|----------------------|-----------------|
| Oud Reemst (OR)     | N 52°2'27 E 5°48'34  | 2005            |
| Reijerskamp (REY)   | N 52°1'0 E 5°46'21   | 2005            |
| Telefoonweg (TW)    | N 52°00'9 E 5°45'8   | 2002            |
| De Mossel (MO)      | N 52°3'40 E 5°45'8   | 1995            |
| Nieuw Reemst (NR)   | N 52°2'33 E 5°46'29  | 1990            |
| Wolfhezer Veld (WV) | N 51°59'43 E 5°47'24 | 1988            |
| Mosselse Veld (MV)  | N 52°4'23 E 5°44'13  | 1985            |
| Dennenkamp (DK)     | N 52°1'43 E 5°48'2   | 1982            |
| Boersbos (BB)       | N 52°3'44 E 5°59'57  | 1982            |

241

242 Supplementary Table 6: Number of taxa within sub-group. Number of taxa within sub-group in each stage of  
 243 abandonment (occurrence > 1 sample), for recent, mid-term and long-term abandoned fields, used in the Spearman  
 244 correlation interaction strength network visualization (Fig. 1A)

| Nr. | Names                   | Recent | Mid-term | Long-term | Nr. | Names                            | Recent | Mid-term | Long-term |
|-----|-------------------------|--------|----------|-----------|-----|----------------------------------|--------|----------|-----------|
| 1   | Proteobacteria          | 398    | 403      | 346       | 31  | AMF                              | 17     | 22       | 30        |
| 2   | Chloroflexi             | 54     | 69       | 51        | 32  | Ascomycota                       | 70     | 86       | 70        |
| 3   | Actinobacteria          | 280    | 241      | 230       | 33  | Basidiomycota                    | 7      | 8        | 9         |
| 4   | Firmicutes              | 38     | 47       | 34        | 34  | Chytridiomycota                  | 5      | 2        | 0         |
| 5   | Acidobacteria           | 254    | 213      | 245       | 35  | Endophytes                       | 11     | 10       | 13        |
| 6   | Verrucomicrobia         | 4      | 99       | 3         | 36  | Molds                            | 17     | 41       | 27        |
| 7   | Gemmatimonadetes        | 40     | 35       | 36        | 37  | Ectomycorrhiza                   | 5      | 2        | 7         |
| 8   | Nitrospirae             | 12     | 5        | 15        | 38  | Nematophagous fungi              | 3      | 9        | 7         |
| 9   | Unclassified (bacteria) | 258    | 274      | 214       | 39  | Other (fungi)                    | 15     | 17       | 13        |
| 10  | Bacteroidetes           | 64     | 91       | 44        | 40  | Potential plant-pathogen         | 10     | 14       | 9         |
| 11  | WD272                   | 6      | 7        | 8         | 41  | Saprotrophic fungi               | 30     | 36       | 31        |
| 12  | Candidate_division_WS3  | 11     | 4        | 6         | 42  | Unknown fungi                    | 128    | 136      | 106       |
| 13  | Planctomycetes          | 30     | 104      | 39        | 43  | Wood decomposer or parasite      | 8      | 9        | 5         |
| 14  | Candidate_division_TM7  | 10     | 12       | 6         | 44  | Yeasts                           | 13     | 14       | 13        |
| 15  | Fibrobacteres           | 3      | 1        | 3         | 45  | Zygomycota                       | 4      | 3        | 8         |
| 16  | SHA-109                 | 2      | 2        | 0         | 46  | Predaceous mesostigmata          | 10     | 14       | 16        |
| 17  | Elusimicrobia           | 1      | 1        | 2         | 47  | Herbo-fungivorous cryptostigmata | 3      | 3        | 3         |
| 18  | WCHB1-60                | 1      | 2        | 1         | 48  | Predaceous prostigmata           | 0      | 3        | 5         |
| 19  | Thermotogae             | 0      | 0        | 1         | 49  | Fungivorous cryptostigmata       | 3      | 7        | 10        |
| 20  | Cyanobacteria           | 0      | 2        | 0         | 50  | Omnivorous prostigmata           | 1      | 1        | 1         |
| 21  | Chlamydiae              | 0      | 3        | 0         | 51  | Bacterivorous astigmata          | 0      | 1        | 0         |
| 22  | Armatimonadetes         | 1      | 2        | 1         | 52  | Herbivorous prostigmata          | 4      | 4        | 4         |
| 23  | Chlorobi                | 0      | 1        | 0         | 53  | Herbivorous cryptostigmata       | 0      | 1        | 2         |
| 24  | TM6                     | 0      | 1        | 1         | 54  | Fungivorous prostigmata          | 2      | 3        | 2         |
| 25  | SM2F11                  | 0      | 0        | 0         | 55  | Fungivorous astigmata            | 0      | 1        | 0         |
| 26  | Archaea                 | 54     | 54       | 54        | 56  | Root-feeding nematodes           | 6      | 7        | 10        |
| 27  | Fungivorous collembola  | 12     | 12       | 12        | 57  | Bacterivorous nematodes          | 11     | 11       | 13        |
| 28  | Predaceous collembola   | 2      | 2        | 1         | 58  | Fungivorous nematodes            | 3      | 4        | 3         |
| 29  | Earthworms              | 2      | 2        | 2         | 59  | Omni-carnivorous nematodes       | 10     | 8        | 10        |
| 30  | Enchytraeids            | 15     | 18       | 20        | 60  | Plants                           | 29     | 29       | 24        |

245

246

247

248

249

250

251

252

253

254

255

256

257

258

259 Supplementary Table 7: Number of taxa within main group. Number of taxa within main group in each stage  
 260 of abandonment (occurrence > 1 sample), for recent, mid-term and long-term abandoned fields, used in the Spearman  
 261 correlation interaction strength network visualization (Fig. 1B).

| Nr. | Names                                 | Recent      | Mid-term    | Long-term   |
|-----|---------------------------------------|-------------|-------------|-------------|
| 1   | Bacteria                              | 1467        | 1620        | 1286        |
| 2   | Archaea                               | 54          | 54          | 54          |
| 3   | Collembola                            | 14          | 14          | 13          |
| 4   | Earthworms                            | 2           | 2           | 2           |
| 5   | Enchytraeids                          | 15          | 18          | 20          |
| 6   | AMF                                   | 17          | 22          | 30          |
| 7   | Fungi                                 | 326         | 387         | 318         |
| 8   | Predaceous mites                      | 10          | 17          | 21          |
| 9   | Fungivorous cryptostigmatic mites     | 3           | 7           | 10          |
| 10  | Omnivorous mites                      | 4           | 5           | 4           |
| 11  | Herbivorous mites                     | 4           | 5           | 6           |
| 12  | Fungivorous non-cryptostigmatic mites | 2           | 4           | 2           |
| 13  | Root-feeding nematodes                | 6           | 7           | 10          |
| 14  | Bacterivorous nematodes               | 11          | 11          | 13          |
| 15  | Fungivorous nematodes                 | 3           | 4           | 3           |
| 16  | Omni-carnivorous nematodes            | 10          | 8           | 10          |
| 17  | Plants                                | 29          | 29          | 24          |
|     | <b>Subtotals</b>                      | <b>1977</b> | <b>2214</b> | <b>1826</b> |

262
